# Supplementary material
Source: PubMed Central journal article supplement (PMC5196890)
Supplement: thnov07p0117s1.pdf [file thnov07p0117s1.pdf]

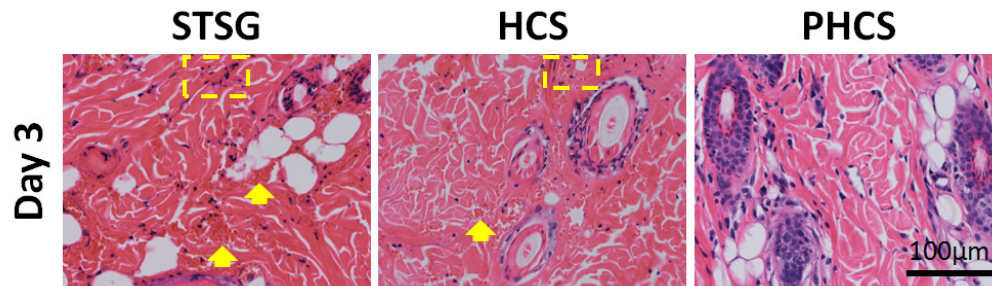

**Figure S1.** HE staining of skin grafts at day 3. Yellow arrows indicate hemorrhage and yellow dashed rectangles indicate neutrophils. The PHCS group had least hemorrhage and neutrophils infiltration.

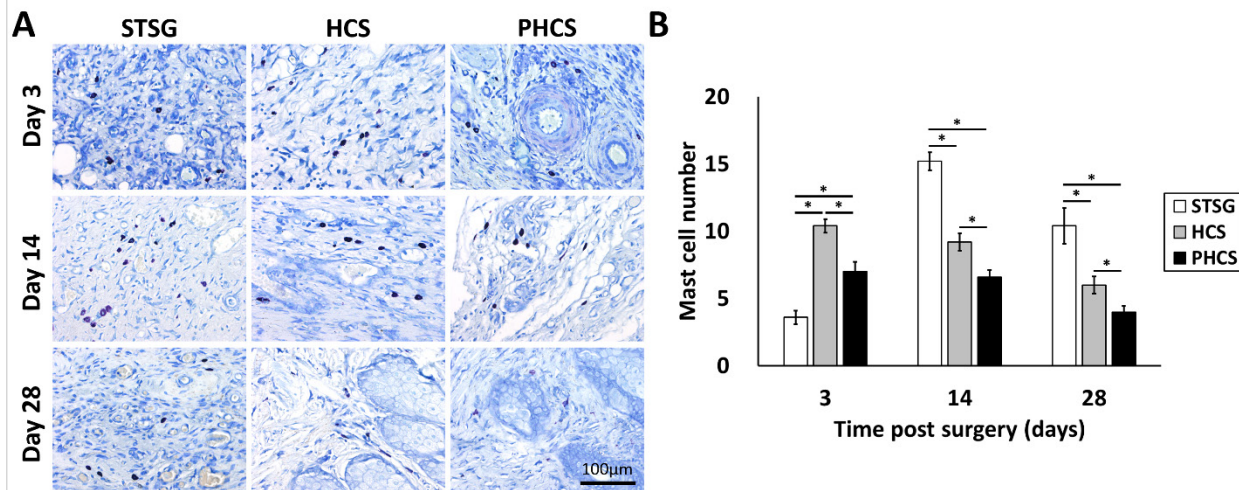

**Figure S2.** Infiltration of mast cells in the granulation tissue beneath the skin grafts. (A) Toluidine blue staining of granulation tissue. Blue: nucleus; violet: mast cell. (B) Quantification of mast cells.  $*p < 0.05$ . The PHCS group had lowest mast cell number compared to HCS and STSG groups.

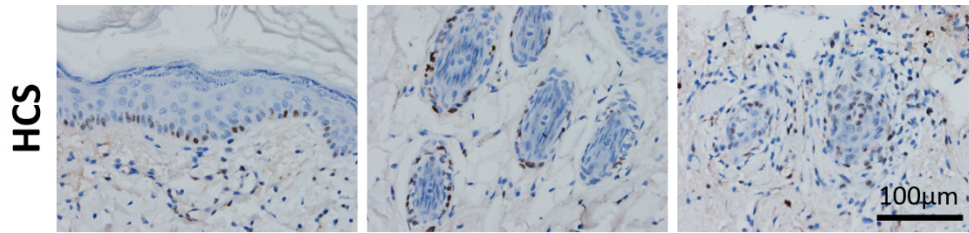

**Figure S3. Human cell staining (NM95) in HCS group at day 3. Blue: nucleus, dark brown: human cell nucleus. Only a small percentage of human cells presented at day 3.**
